# Supplementary material for: Bilateral Retinal Artery Occlusion; A Retrospective Analysis of Clinical Presentation and Management
Source: Research Square preprint supplement (doi:10.21203/rs.3.rs-438378/v1), 2021-05-04
Supplement: Supplementary file 1 [file 0a86d10d745f5f48b2eeed3d.xlsx]

## Sheet: Sheet1
Sl. No.	Name	MR. No	UID No.	Age	Date of visit	Sex	Complaints and history	BCVA OD	BCVA OS	Ant Seg OD	Ant Seg OS	IOP OD	IOP OS	FUNDUS OD	Fundus OS	DM/HT/CARDIAC Status	Other Systemic Issues	Echocardiography	Carotid Doppler	MRI Brain	Interventions done	Follow up visit 1	Additional History
1	Jothi J	5116001	UID 0015243484	66	06.12.2019	F	LE DOV since 5 days and RE DOV since morning (8hrs) and was diagnosed LE CRAO elsewhere	PL+	PL+	Lenticular changes +	Lenticular changes +	10	15	CRAO, Optic disc Drusen	CRAO, Optic disc Drusen	DIABETES since 5 years 3 days , Under Rx T.TRIBET 1 MG 1-0-1 (After food) 2 times a day T.METFORMIN 500MG 1-0-1 (After food) 2 times a day T.GLIBENCLAMIDE 5MG 0-0-1 (After food) 1 time a day HYPERTENSION since 3 years 3 days , Under Rx T.TELMA 40MG 0-0-1 (After food) 1 time a day T.MET XL 25MG 1-0-0 (After food) 1 time a day T.ENALAPRIL 2.5MG 1-0-0 (After food) 1 time a day CARDIAC since 3 years …	POST ANGIO GRAM DONE 3 YRS BACK) H/O RHEUMATOID ARTHRITIS 10 YRS, PT ON T.BECOMPLEX 1-0-0, T.DOXY 0-0-1	Concentric LVH, Heavily calcified PML and Papillary muscle, chordae. AV Sclerosis, AR trivial, Mild Hypokinesia of IVS, Ejection fraction 60 %, Grade I LVDD, No pericardial effusion, No pulmonary hypertension.	Calcified plaque in right carotid bulb extending to ICA. No eviddence of luminal narrowing/ occlusion. Both carotid artery shows normal colour filling and spectral wave pattern as on 02.12.2019	MRI brain - acute infarct both cerebellum of MCA and PCA areas	RE Gonio massage done, RE AC paracentesis done	30 dec 2019, RE developed NVI, RE PRP was done in 2 sittings
					30.12.2019			HM	PL+	NVI	NO NVI	12	16	CRAO, Optic disc Drusen, PRP MARKS	CRAO, Optic disc Drusen							RE PRP was done in 2 sittings
					04.03.2020			FCF	PL+	Regressed NVI	NO NVI	20	16	CRAO, Optic disc Drusen, PRP MARKS	CRAO, Optic disc Drusen
0	Karthikeyan	4712292	UID0012463451	31	05.02.2018	M	H/o severe headache on 16- 1- 2018, was admitted in the hospital for 2 days after 2 days of onset of headache observed LE defective vision and drooping of left upper lid. since 3 days c/o defective vision in RE also PAST HISTORY- chronic smoker and alcoholic has an episode of acute pancreatitis last year patient was diagnosed to have DM 20 days back- on Insulin CT scan om 31- 1- 18 done at KGS sh…	1/60	PL+	Minimal elevation and depression(total ophthalmoplegia)	total ophthalmoplegia	16	16	Retinal edema in posterior pole, cotton wool spots in posterior pole, suggestive of ? REPERFUSED CRAO., ORBITAL APEX SYNDROME	CRAO, ORBITAL APEX SYNDROME	DIABETES since 20 days , Under Rx, Insulin	ACUTE PANCREATITIS, CHRONIC KIDNEY DISEASE ; SMOKING AND ALCOHOL STOPPED 4 MONTHS BACK					20.03.2018		optos photo
					20.03.2018		f/u/c le rhino-orbital mucormycosis on treatement with voriconazole ; s/p debridement right sided facial palsy with left sided multiple cranial nerve palsies and orbital apex syndrome & cavernous sinus thrombosis ON I.V VORICONAZOLE for the past 4 days RE reperfused crao ; le crao	6/36p	PL+	Lagophthalmos , bells phenomenon poor. Limitation of elevation -2, depression-1abduction -1 , adduction -3. Loss of nasolabial fold , on clinching teeth deviation of mouth to left side present	Severe Ptosis, Total ophthalmoplegia, Corneal sensations absent, Sensations on forehead reduced	14	14	Retinal edema in posterior pole, cotton wool spots in posterior pole, suggestive of ? REPERFUSED CRAO.	CRAO
					03.01.2019 (last follow up)		This was last follow up. Patient developed neurotrophic keratopathy in LE during follow ups	6/36p	PL+	Confrontation -defective temporal, inferior & nasal fields, corneal sensation -decreased	mutiple PEE s, 1mm X 3mm corneal infiltrate long inferior cornea close to limbus, exposure keratopathy	14	…		pale disc,
3	G Saraswathi	4736584	UID0012609321	49	15.03.2018	F	RE defective vision since 6 months and LE defective vision since 15 days	6/60	6/36	RAPD+	normal	15	14	Disc pallor, MNF, arteriolar attenuation, Old CRAO	Cilioretinal artery sparing CRAO	HTN since 5 years, on TAB.ANGICAM BETA	Chronic renal failure	normal	normal	CT Brain - hypodensity in right periventricular region of frontal lobe ? Ischemic lesion, lacunar infarct in left lentiform nucleus	CAROTID DOPPLER NORMAL, ECHO DONE OUTSIDE AT A GOVERNMENT HOSPITAL, SERUM HOMOCYSTIENE NORMAL, CT SCAN DONE OUTSIDE		started on Tab Ecosprin and Tab Vitagrams
					03.01.2019 (Last follow up, FFA done on this date)			6/60	6\24	RAPD+	normal	15	14	Disc pallor, MNF, arteriolar attenuation, Old CRAO	Cilioretinal artery sparing CRAO
4	Ayyar O	4743739	UID0012634409	70	26.3.2018	M	c/o DOV in RE since 3 days was diagnosed CRAO . h/o IHD 18 years back. Not on treatment. Carotid Doppler was normal. 2D ECHO shows sclerosed Aortic valve. ESR was raised 28mm/hr, CRP was raised 6.7 mg/l, started on clopidogril and aspirin	PL+	2020-06-06	RAPD and PCIOL	PCIOL	10	11	Disc edema , arterial attenuation with box carring, cherry red spot.	normal	IHD since 18 years not on any treatment, 2DECHO shows sclerosed Aortic valve, Raised ESR and CRP	GCA, was referred to neuro surgeon for temporal artery biopsy. (but not done)	LA is dilated, no regional wall abnormality at rest, normal LV systolic function, mitral regurgitation grade I, Aortic valve sclerosed, Aortic regurgitation trivial, no pericardial effusion, No LA/LV clot, Good LV function, LVEF : 60%	No evidence of hemodynamically significant plaques or stenosis seen at present.		3 doses of IVMP given
					10.4.2018		H/o sudden DOV in LE on 4.4.2018, was diagnosed LE CRAO outside. Neuro clinic opinion was taken for GCA and was given 3 doses of IVMP for presumed GCA	NPL	NPL	3 mm non reacting pupil	3mm non reacting pupil	9	8	cherry red spot	Disc edema, cherry red spot
					12.04.2018		3 doses of IVMP over. Patient was referred for temporal artery biopsy, but patient GOT LOST TO FOLLOW UP.	NPL	NPL
5	Ramasamy P	p4530794	UID0011379562	64	3.5.17	M	RE defective vision since 10 days and LE defective vision since 2 years	HM	NPL	360 degree NVI	360 deg NVI, NVG, Absolute glaucoma	20	38	CRAO, NVD	old CRAO, Sclerosed vessels, NVG, Glaucomatous optic atrophy	DM 10 years, HTN 10 years, CVA episode 15 days back.					RE PRP done in 2 sittings in May
					5.9.17			HM	NPL	360 degree NVI, NVG	360 degree NVI, NVG, Absolute glaucoma	20	28	CRAO, PRP MARKS	old CRAO, Sclerosed vessels, NVG, Glaucomatous optic atrophy
6	Andal V	p3799945	UID0003359513	63	04.08.2017	M	c/o DOV in RE since 1 day, k/c/o BE POAG since 2014	PL+	6/9	PCIOL	PCIOL	18	18	0.8 CDR, cherry red spot	0.6 CDR	HTN since 30 years, DM since 2 years, CVA since 3 years		Dense calsific echogenic mass attached to post mitralannular - calcified mitral valve disease, plaque noted near right common carotid artery			RE gonio massage done, RE AC paracentesis done
					19.06.2018	M	C/o LE DOV since 2 days	1/60	6/12	PCIOL	PCIOL	10	14	0.9 CDR, pale disc, Old CRAO	0.6cdr, inferotemporal BRAO				s/o plaque in right carotid bulb		LE gonio massage done
					03.11.2018			1/60	6/12			18	16	0.9 CDR, pale disc, Old CRAO	0.7 cdr, Cotton wool spots inferior to disc, Inferotemporal BRAO
					23.12.2019			1/60	6/12			18	16	0.9 CDR, pale disc, Old CRAO	0.7 cdr, Cotton wool spots inferior to disc, Inferotemporal BRAO
7	Sundara pandiyan	f1667984	UID 0009830415	57	14/4/16	M	C/o BE DOV since 1 week	2/60	2/60	normal	normal	12	12	Cherry red spot, CRAO	cherry red spot, CRAO		chronic alcoholic since 20 years, h/o subacute pancreatitis since 1 week, ESR-83, CRP-75 mg/l						CT abdomen shows subacute intersitial pancreatitis, thin rim of ascitis, b/l pleural effusionwith B/L pulmonary basal pneumonitic changes, B/l inguinal hernia	FFA done
					16/4/16			1/60	2/60	normal	normal	12	12									OCT done- BE hyperreflective inner retina with sub foveal detachment, FFA done shows BE macular ischemia
					17/2/17			5/60	6/36	normal	normal	16	17	consecutive optic atrophy, RPE degeneration	Consecutive optic atrophy
8	malar kodi	p4488382	UDI 0011133934	42	27/2/17	F	c/o DOV LE since 10 days, H/o CT BRAIN 1 month back - right parieto occipital infarct, right MCA infarct	2020-06-09	FCF	normal	normal	13	16	cotton wool spots, RPE degeneration, cilioretinal artery occlusion	disc pallor, sclerotic vessels, cotton wool spots, RPE degeneration	Hypertensive since 5 years, IHD since 2 years, epilepsy 1 year back.						OCT BE - parafoveal hyper reflective and atrophic inner layer
					2017-06-03			2020-06-09	3/60			12	16	cotton wool spots, RPE degeneration, cilioretinal artery occlusion	disc pallor, sclerotic vessels, cotton wool spots, RPE degeneration							FFA done
					07.06.2017			2020-06-09	3/60			13	15	STATUS QUO	STATUS QUO
9	Gopal	p4533540	UDI0011393892	70	06.05.2017	M	LE DOV since 3 days, k/c/o RE CRAO since 3 years, chronic smoker.	1/2/60	HM	PCIOL	PCIOL, RAPD	10	10	Attenuated vessels, old CRAO	cherry red spot, CRAO	hypertension since 5 years, IHD since 3 years	chronic smoker	Concentric LVH, aortic regurgitiation grade II	normal	normal	Gonio massage done, LE PPV and clot dislodgment ATTEMPTED ON 11.05.2017
					26.07.2017							11	13	STATUS QUO	ATTENUATED VESSELS
10	Krishna Kumari P	4428677	UID 0010786411	52	26.11.2016	F	sudden painless loss of vision - 1 month before she had high blood sugar value , admitted at outside diabetic hospital diagnosed as ?INFLAMMATORY RETINAL VASCULITIS since no improvement in vision they went to LV PRASAD HOSPITAL. there she treated as ? INFLAMMATORY - CENTRAL RETINAL ARTERY OCCLUSION she is on tab.wysolone 30 mg per day	HM	HM	Lenticular changes, reaction to light fixed	Lenticular changes, reaction to light fixed	attenuated vessel, sheathed vessels suggestive of CRAO	attenuated vessel, sheathed vessels suggestive of CRAO	DIABETES since 14 years , Under Rx, Insulin human actrapid 24 (After food) 3 times a day human insulatard 22 (After food) 1 time a day 1 month HYPERTENSION since 3 months , Under Rx losartan-h (After food) 1 time a day. Patient was referred to retina clinic, but she got lost to follow up.	RA factor - normal OCT (Done outside)- FOVEAL THINNING AND LOSS OF INNER RETINAL LAYERS	ct brain - normal ; carotid doppler - normal; echo - normal; ANA - normal; homocysteine-normal,	Normal	CT Brain-Normal
11	Rayapati Thiripalaiah	F1816542	UID 0011584427	63	21.06.2017	M	c/o sudden def vn in both eyes -within past 25 days. bfr 25 days attender says pt had good vn. no h/o trauma /hypertension on and off mouth ulcers x 1 year , No h/o Tb / amaurosis/ joint pain / back pain/ fever / trauma	LP+	HM+	Nuclear Sclerosis-II, -III PSC	Nuclear Sclerosis-II, -III PSC	CRAO	CRAO	Patient was advised carotid doppler and blood investigations but he got lost to follow up. Did not return. Nil systemic as per records
12	Srinivasalu Naidu	F1840617	UID0011826562	73	19.08.2017	M	LE Defective Vision since 2 months RE Defective Vision since 1 month	NLP	LP+	Cataract-Early Cataract	Cataract-Early Cataract	ATTENUATED VESSELS , CONSEQUTIVE OPTIC ATROPHY CRAO	ATTENUATED VESSELS , CONSEQUTIVE OPTIC ATROPHY CRAO	NIL SYSTEMIC BUT PEDAL OEDEMA PRESENT ON PRESENTATION - PATIENT WAS REFERRED TO PHYSICIAN. GOT LOST TO FOLLOW UP. NO REPORTS AVAILABLE.

## Sheet: Sheet2
sr. no	name	RBS	HbA1C	Glucose fasting	blood urea	serum creat	total cholesterol	Total triglyceride	HDL cholesterol	LDL cholestrol	VLDL cholesterol	T.cho/HDL ratio	LDL/HDL ratio	Micro albumin	Total WBC count	CRP	ESR	Hb	BT	CT	Platelet count	Total RBC count	Packed cell volume	MCH	MCHC	MCV	MPV	S. homocystine
1	jothi j	146					179	122	42	112	24	4.3	2.7		18300		108	9.8	2	4.3		3.62	28.6	27.1	34.3	79	8.1
2	karthikeyan				29	0.9
3	G Saraswathi	85			103	2.4
4	Ayyar		5.7	89	20	1.1	142	58	35	98	12	4.1	2.7			6.7	28	13.7			2.08		42
5	Ramasamy P	378			33		230	170	45	140	34	5.1	3.1					14.5			3.04	4.12
6	Andal V		5.8	102	20	0.9	208	87	50	141	17	4.2	2.8	66
7	Sundara Pandiyan	138			32	1.3	113								6800	75	83	11.9
8	Malar kodi		5.1	88	32	1	106	125	26	53	25	3.6	2	162				7.9
9	Gopal	87			29	1.3
10	March		5.5				135	70	36	88	14	3.8	2.4															12.28

## Sheet: Sheet3
Sl. No.	Name	MR. No	UID No.	Age	Date of visit	Sex	Complaints and history	BCVA OD	BCVA OS	Ant Seg OD	Ant Seg OS	FUNDUS OD	Fundus OS	DM/HT/CARDIAC Status	Other Systemic Issues	Echocardiography	Carotid Doppler	MRI Brain	Interventions done	Follow up visit 1	Additional History
